# Supplementary material
Source: publisher figshare collection journal article supplement (https://sage.figshare.com/ndownloader/files/12691832)
Supplement: Supplementary file 1 [file 12691832]

## Sheet: Supp Table 2, Literature report
Supplementary Table 2: Clinical, Gross, and Histopathologic Findings of Cases Reported in the Scientific Literature
#	Location	Distribution	Species (Common name)	Genus and Species	Sex	Age (years)	Clinical History	Significant Gross Findings	Incidental Diagnoses (Secondary infections/conditions)	Histopathology/Microscopic Diagnoses	Antifungal Treatment	Cause of Death	Method of Diagnosis	References
1	Imported from Senegal to the UK	Cutaneous	Baboon	Papio	M	N/A	Ulcers on muzzle and tail	External lesions extended into the nasal sinuses Edema and inflammation of lungs	NR	NR	None	Euthanized due to Coccidioides	Histology	Welshman 1981
2	London	Cutaneous	Baboon	Papio	NR	1 mo	Serpiginous ulcers on face	NR	NR	Yeast-like organism resembling Blastomyces coccidioides found in ulcers	NR	Euthanized, rejected by mother	Histology	Hamerton 1937
3	San Antonio, TX	Bone (vertebral)	Baboon	Papio	M	4	Lameness Loss of function of hindlimbs	Paravertebral abscess Bone necrosis and osteomyelitis	None	Affected tissues were granulomatous and C. immitis-like spherules found	None	Poor prognosis, euthanized	Histology, serology	Rosenberg 1984
4	San Antonio, TX	Thoracic	Baboon	Papio	F	2.70773	Natural death	Ulceration of esophagus Lung darkly colored and adherent to chest wall	Bile duct hyperplasia Fibrosis in liver	Pyogranulomatous inflammation with necrosis in lung and esophagus, with C. immitis spherules present	None	Found dead w.out clinical signs	Histology(IHC), serology	Bellini 1991
5	Imported to Canada from Norco, California 30 days prior	Disseminated	Baboon (Gelada)	Theropithecus gelada	F	Adult	Nasal discharge Extensive coughing and respiratory distress	Lesions found in lung, kidney, lymph nodes, esophagus	None	Fibrosis and granuloma formation in lungs Granulomatous lesions in mediastinal lymph nodes and kidney Fibrosis and spherules in esophagus	None	Found dead 1 month after diagnosis	Histology, C. immitis cultured (innoculated guinea pig)	Rapley 1974
6	AZ	Disseminated	Baboon (Mandril)	Mandrillus sphinx	M	5	NR	Disseminated	NR	NR	NR	DCM	NR	Reed 1984
7	Texas A&M U Vet Teaching Hospital	Disseminated	Baboon (Mandril)	Mandrillus sphinx	M	7	Progressive anorexia Depression Lethargy Increased lung sounds Weight loss Euthanized	Pyogranulomas in mediastinum, myocardium, on diaphragm, pulmonary artery, and throughout lung fields Granulomatous osteomyelitis Atelectasis and pneumonia	Interstitial nephritis Pyelonephritis	C. immitis found in the pulmonary artery, lymph nodes, and bone	None	DCM, euthanized	Serology, culture, histology	Johnson 1998
8	Davis, California	NR	Bonnet macaque	Macaca radiata	M	NR	Weight loss Dehydration Diarrhea Intrathoracic mass	N/A	N/A	N/A	None	N/A	Serology	Beaman 1980
9	San Diego, CA	NR	Cebus	Cebus hypoleucus	NR	NR	NR	NR	NR	Lung tissues contained C. immitis spherules	NR	NR	Histology	Mckenney 1944
10	AZ	Disseminated	Celebes crested macaque	Macaca nigra	F	1	NR	Disseminated	NR	NR	None	DCM	NR	Reed 1984
11	AZ	Disseminated	Celebes crested macaque	Macaca nigra	F	3	Polypoid granuloma in trachea	Disseminated	NR	NR	None	DCM	NR	Reed 1984
12	AZ	Disseminated	Celebes crested macaque	Macaca nigra	M	10	Cough	Disseminated	NR	NR	Ketoconazole	DCM	Serology	Reed 1984
13	Central AZ	Disseminated	Chimpanzee	Pan troglodytes	M	22	NR	Adhesions throughout thorax and abdomen Light foci throughout lungs	NR	NR	NR	NR	Serology, histology	Long 1981
14	Gladys Porter Zoo, TX	Disseminated	Chimpanzee	Pan troglodytes	M	4	Acute lethargy Abdominal distension	Ascites Pneumonia and pulmonary edema Pleural effusion Meningitis Mesenteric fungal masses	Renal tubular necrosis associated with enterocolitis (COD)	No evidence of Coccidioides	Fluconazole, Posaconazole	Other disease	Serology and CSF positive, histology	Herrin 2005
15	Central AZ	Bone; Esophagus	Chimpanzee	Pan troglodytes	M	10	NR	Bone lesions Perforation of esophagus	NR	NR	NR	NR	Serology, histology	Long 1981
16	AZ	Disseminated	Chimpanzee	Pan troglodytes	F	>6	NR	Disseminated	NR	NR	NR	DCM	NR	Reed 1984
17	AZ	Disseminated	Chimpanzee	Pan troglodytes	M	>8	NR	Disseminated	NR	NR	NR	DCM	NR	Reed 1984
18	AZ	Disseminated	Chimpanzee	Pan troglodytes	M	6	NR	Disseminated	NR	NR	NR	DCM	NR	Reed 1984
19	AZ	Disseminated	Chimpanzee	Pan troglodytes	NR	N/A	NR	Disseminated	NR	NR	NR	DCM	NR	Reed 1984
20	AZ	Disseminated	Chimpanzee	Pan troglodytes	M	8	NR	Disseminated	NR	NR	NR	DCM	NR	Reed 1984
21	AZ	Disseminated	Chimpanzee	Pan troglodytes	F	6	NR	Disseminated	NR	NR	NR	DCM	NR	Reed 1984
22	AZ	Disseminated	Chimpanzee	Pan troglodytes	NR	NR	Clinically apparent respiratory disease	Disseminated	NR	NR	None	DCM	Serology	Ingram 1975
23	AZ	Disseminated	Chimpanzee	Pan troglodytes	NR	NR	Clinically apparent respiratory disease	Disseminated	NR	NR	None	DCM	Serology	Ingram 1975
24	From San Francisco to New Mexico	Disseminated	Chimpanzee	Pan troglodytes	M	3	Respiratory signs	Granulomatous pneumonia, lymphadenitis, bronchitis Brain, heart, liver, spleen had regions of inflammation	None	Endospores within lungs and lymph nodes	None	Natural death due to DCM	Culture, histology	Strutton 1964
25	Arizona	Thoracic	Chimpanzee	Pan troglodytes	M	Adult	NR	Lungs diseased and adherent to pleurae	Periosteal lesions (Hypertrophic Pulmonary Osteoarthropathy)	NR	NR	Coccidioides	NR	Marzke 1984
26	Central AZ	Bone, Disseminated	Chimpanzee	Pan troglodytes	M	10	NR	Lytic bone lesions Destruction of lung with granulomas, cysts, necrosis, and hemorrhage Pleural and abdominal adhesions Abscess near pelvis Lesions in liver, spleen, and kidney Edema on the brain	NR	NR	NR	NR	Serology, histology	Long 1981
27	Central AZ	Bone, Disseminated	Chimpanzee	Pan troglodytes	M	8	NR	Lytic bone lesions Lungs adherent with white coalescing foci and dark parenchyma Abdominal adhesions White focal lesions on peritoneum, spleen, liver, colon, and kindeys	NR	NR	NR	NR	Serology, histology	Long 1981
28	Southern NM	Abdominal (Pancreas; Aorta)	Chimpanzee	Pan troglodytes	M	26	HIV positive Abdominal distension	Mass encasing pancreas and abdominal aorta	HIV Positive	C. immitis found in several organs, and within peritoneal cavity	NR	NR	NR	Black 2010
29	AZ	NR	Chimpanzee	Pan troglodytes	NR	NR	Clinically apparent respiratory disease	N/A	N/A	N/A	None	N/A	Serology	Ingram 1975
30	AZ	NR	Chimpanzee	Pan troglodytes	NR	NR	Clinically apparent respiratory disease	N/A	N/A	N/A	None	N/A	Serology	Ingram 1975
31	AZ	NR	Chimpanzee	Pan troglodytes	NR	NR	Clinically apparent respiratory disease	N/A	N/A	N/A	None	N/A	Serology	Ingram 1975
32	Central AZ	NR	Chimpanzee	Pan troglodytes	M	N/A	NR	N/A	NR	NR	NR	NR	Serology, histology	Long 1981
33	Central AZ	NR	Chimpanzee	Pan troglodytes	F	N/A	NR	N/A	NR	NR	NR	NR	Serology, histology	Long 1981
34	Southern NM	Bone, Disseminated	Chimpanzee	Pan troglodytes	M	24	Mild lameness Neurological signs	Osteolytic mass incorporating T11, T12, T13 vertebrae	NR	C. immitis found in several organs, and within peritoneal cavity	NR	NR	NR	Black 2010
35	Primate Foundation of Arizona	Eye	Chimpanzee	Pan troglodytes	F	Dx at 9 , 21 at time of paper	Sneezing Coughing Lethargy Inappetance	Uveitis secondary to coccidioidal granuloma	N/A	N/A	Triazole, ketoconazole, then fluconazole	N/A Alive at conclusion	Serology and radiographic evidence	Hoffman 2007
36	From MD to AZ	Disseminated	Chimpanzee	Pan troglodytes	M	10	Weight loss Pale mucous membranes Edema of scrotum and feet Ascites Clinically apparent respiratory disease	White focal lesions found in lungs, diaphragm, abdominal wall, spleen, liver, and kidneys Sero-sanguinous fluid in thorax Lungs dark, edematous, and adherent Abdomen contained clear yellowish fluid with numerous adhesions Spleen and liver swollen Kidneys pale	Nutritional secondary hyper-parathyroidism	Granulomas and C. immitis spherules in lungs and on pleural surface, as well as within the pancreas, thyroid gland, adrenal cortex, liver, and cardiac muscle Liver contained abscesses	None	DCM	Serology	Ingram 1975
37	Alice, TX	Disseminated	Cynomolgus macaque	Macaca fascicularis	M	5.83	Urinary incontinence, Rear limb paresis and neurologic deficits; chagas positive	Disseminated: Lungs, Vertebrae, Hilar lymph nodes	Chronic lymphocytic cystitis	Coccidioides in Lungs, lymph nodes, and vertebrae	None	DCM	Histology	Mense 2013
38	AZ	Disseminated	Gorilla	Gorilla spp.	M	>8	NR	Disseminated	NR	NR	NR	DCM	NR	Reed 1984
39	AZ	Disseminated	Gorilla	Gorilla spp.	M	>4	NR	Disseminated	NR	NR	NR	DCM	NR	Reed 1984
40	San Diego Zoo, Imported from Gabon to San Diego Zoo	Disseminated	Gorilla	Gorilla spp.	M	13	Dry cough	Granulomas in lung, pleura, hilar lymph nodes, epicardium, vocal cord, trachea, spleen, liver, testis	Glomerulonephritis Renal infarcts Testicular atrophy	Endospores found in granulomas	None	Natural death due to DCM	Serology	Benirschke 1981
41	Fresno Zoo, CA	Disseminated	Gorilla	Gorilla spp.	F	16	Depression Coughing Mediastinal mass and pleural effusion	Microabscesses in lung, hilar lymph nodes, spleen, and epicardium Large cavities and granulomas in lung Pleural and peritoneal adhesions	Cystic follicles Glomerulonephritis Balantidiasis	C.immitis cultured from lung, lymph nodes, spleen Endospores found in granulomas	Amphotericin B	Natural death due to DCM	Serology, culture, histology	Benirschke 1981
42	Phoenix Zoo	NR	Gorilla	Gorilla spp.	M	20	Inappetance Weight loss Respiratory signs	N/A	N/A	N/A	Ketoconazole, received experimental vaccine	N/A	Serology	Hood 1984
43	AZ, Phoenix Zoo	NR	Gorilla	Gorilla spp.	M	20	NR	NR	NR	NR	NR	NR	NR	Hood 1984
44	San Diego Zoo	NR	Gorilla	Gorilla spp.	M	Adult	NR	NR	NR	NR	NR	NR	NR	Hood 1984
45	San Diego, CA	Disseminated	Gorilla	Gorilla spp.	M	15	Anorexia Lethargy Dyspnea Stertorous breathing Hemorrhage from right nares Natural death	White lesions in liver Spleen soft and pulpy with tubercle-like lesions Brownish-green fluid in pleural cavity Hemmorhagic lesions on pleura Tubercles throughout lungs Abscess cavity in one lobe of lung,	None	Large numbers of C. immitis in liver, spleen, and lung	None	Coccidioides, natural death	Histology, culture, innoculated	Mckenney 1944
46	AZ	Disseminated	Guenon, DeBrazza	Cercopithecus sp	M	>6	NR	Disseminated	NR	NR	NR	DCM	NR	Reed 1984
47	AZ	Disseminated	Guenon, DeBrazza	Cercopithecus sp	F	>7	NR	Disseminated	NR	NR	NR	DCM	NR	Reed 1984
48	AZ	Disseminated	Guenon, DeBrazza	Cercopithecus sp	F	>3	NR	Disseminated	NR	NR	NR	DCM	NR	Reed 1984
49	AZ	Disseminated	Guenon	Cercopithecus sp	F	5	NR	Disseminated	NR	NR	NR	DCM	NR	Reed 1984
50	London	Disseminated	Guenon	Cercopithecus sp	NR	NR	NR	NR	NR	C. immitis present in lung culture	NR	NR	Culture	Fiennes 1967
51	Dilley, TX	NR	Japanese macaque	Macaca fuscata	M	16	Skin lesion, Lytic lesion	N/A	N/A	N/A	Fluconazole	N/A	Positive culture, radiographic evidence	Graybill 1990
52	Dilley, TX	NR	Japanese macaque	Macaca fuscata	M	5	Cough, Lytic Lesion	N/A	N/A	N/A	Fluconazole	N/A	Positive culture	Graybill 1990
53	Dilley, TX	NR	Japanese macaque	Macaca fuscata	M	6	Skin lesions	N/A	N/A	N/A	Fluconazole	N/A	Positive culture	Graybill 1990
54	Dilley, TX	NR	Japanese macaque	Macaca fuscata	F	12	Cough	N/A	N/A	N/A	Fluconazole	N/A	Serology	Graybill 1990
55	Dilley, TX	NR	Japanese macaque	Macaca fuscata	M	<3	Cough, Spine lesion, Paralysis	N/A	N/A	N/A	Fluconazole	N/A	Clinical sign	Graybill 1990
56	Dilley, TX	NR	Japanese macaque	Macaca fuscata	M	5	Cough	N/A	N/A	N/A	Fluconazole	N/A	Cough and weight loss	Graybill 1990
57	Dilley, TX	NR	Japanese macaque	Macaca fuscata	M	3	Skin lesion	NR	NR	NR	Fluconazole	Coccidioides	Positive culture	Graybill 1990
58	Dilley, TX	NR	Japanese macaque	Macaca fuscata	M	12	Cough, Spine lesion	NR	NR	NR	Fluconazole	Coccidioides	Positive culture, radiographic evidence	Graybill 1990
59	Dilley, TX	NR	Japanese macaque	Macaca fuscata	M	<3	Cough Spine lesion	NR	NR	Lesions positive for C. immitis	Fluconazole	Coccidioides	Histology	Graybill 1990
60	Dilley, TX	NR	Japanese macaque	Macaca fuscata	F	5	Cough	NR	NR	NR	Fluconazole	Suspected Coccidioides	Serology, radiographic evidence	Graybill 1990
61	Dilley, TX	NR	Japanese macaque	Macaca fuscata	M	5	Cough Spine lesion	NR	NR	NR	Fluconazole	Suspected Coccidioides	Serology	Graybill 1990
62	Dilley, TX	NR	Japanese macaque	Macaca fuscata	M	5	Cough	NR	NR	NR	Fluconazole	Suspected Coccidioides	Serology	Graybill 1990
63	Dilley, TX	NR	Japanese macaque	Macaca fuscata	F	5	Cough	NR	NR	NR	Fluconazole	Suspected Coccidioides	Serology	Graybill 1990
64	Dilley, TX	NR	Japanese macaque	Macaca fuscata	F	11	Cough	NR	NR	NR	Fluconazole	Suspected Coccidioides	Cough and weight loss	Graybill 1990
65	Dilley, TX	NR	Japanese macaque	Macaca fuscata	M	6	Cough	NR	NR	NR	Fluconazole	Suspected Coccidioides	Cough and weight loss	Graybill 1990
66	Dilley, TX	NR	Japanese macaque	Macaca fuscata	M	19	Cough	NR	NR	NR	Fluconazole	Suspected Coccidioides	Cough and weight loss	Graybill 1990
67	Dilley, TX	NR	Japanese macaque	Macaca fuscata	F	14	Cough	NR	NR	NR	Fluconazole	Suspected Coccidioides	Cough and weight loss	Graybill 1990
68	From Pheonix, AZ to Oklahoma City	Disseminated	Lemur	Lemur catta	M	2	Dyspnea Pleural effusion Ascites Peritonitis	Caseous abscesses on pleura and throughout lungs Cavitary lesion in chest wall Pale liver with several abscesses in parenchyma Intestines adherent with fibrinous tags Spleen had several nodules Dura on calvarium pigmented yellow	Pale kidneys with multiple infarcts, hemorrhage, and fibrin Cystitis Pyelonephritis	Granulomas seen in retina C. immitis spherules seen in pulmonary tissue, cavitary lesion, and retina	None	Disseminated disease, euthanized	Histology, culture, serology	Burton 1986
69	AZ	Disseminated	Lion-tailed macaque	Macaca silenus	M	8	NR	Disseminated	NR	NR	NR	DCM	NR	Reed 1984
70	California from El Paso	Disseminated	Rhesus Macaque	Macaca mulatta	F	Adult	Flaccid paralysis of right hind limb	Mass in tissues surrounding dorsal spinous process of T11, extending into vertebral foramen and around spinal cord Nodules in spleen and liver Subpleural cavities in lungs Hilar lymph nodes enlarged	None	Granulomatous reaction and spherules in lung and spinal mass Bone lysis in T11 Axonal degeneration and demyelination in spinal cord Pachymeningitis	None	Coccidioides	Histology, serology	Castleman 1980
71	AZ	Thoracic	Rhesus Macaque	Macaca mulatta	M	Adult	NR	Pneumonia	NR	NR	NR	Pneumonia?	NR	Reed 1984
72	El Paso, TX	Thoracic	Rhesus Macaque	Macaca mulatta	M	Adult	Tachypnea Dyspnea Euthanized	Thoracic organs adherent White nodules throughout lungs and evidence of collapse Cavitary lesions within lungs arising from airways	NR	Granulomatous reactions and C. immitis-like spherules found throughout lesions	None	Destructive pulmonary disease	Radiographic, culture, histology, serology	Breznock 1975
73	From Sierra Leone, to California (Davis) via London	Disseminated	Sooty mangabey	Cercocebus atys	F	Adult	Weight loss Wheezing Abscess on nose	Abscess in lung and mediastinum Spleen enlarged Lytic lesions in vertebrae, tibia, femur, skull, scapula, humerus, and pelvic bones	None	C. immitis cultured from affected bones and skin of face	None	Euthanized due to recurring abscesses	Culture, innoculation of mice, histology	Pappagianis 1973
74	Imported from South America to London	Thoracic	Spider monkey	Ateles hybridus	NR	NR	NR	Lung lesions	NR	C. immitis present in lung culture	NR	NR	Culture	Fiennes 1967
75	AZ	Thoracic	Spider monkey	Ateles hybridus	M	16 mo	NR	Pneumonia, pleuritis	NR	NR	NR	Pulmonary disease	NR	Reed 1984
76	AZ	Disseminated	Squirrel monkey	Squirrel monkey	NR	N/A	NR	Disseminated	NR	NR	NR	DCM	NR	Reed 1984
77	AZ	Disseminated	Woolly Monkey	Lagothrix	M	Adult	NR	Disseminated	NR	Spherules found in testicles	NR	DCM	Histology	Reed 1984
78	AZ	Disseminated	Woolly Monkey	Lagothrix	F	6	NR	Disseminated	NR	NR	NR	DCM	NR	Reed 1984
79	Canada- Ontario Veterinary College	NR	Woolly Monkey	Lagothrix	NR	NR	NR	NR	NR	NR	NR	NR	Histologically	Rapley 1974
